# Supplementary material
Source: HighWire-hosted journal article supplement (https://erj.ersjournals.com/content/54/4/1901483)
Supplement: inline-supplementary-material-1 [file inline-supplementary-material-1.pdf]

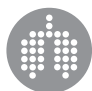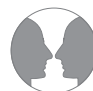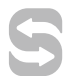

SHAREABLE PDF

# On the valid publication of names of mycobacteria

Aharon Oren<sup>1</sup> and Martha E. Trujillo<sup>2</sup>

**Affiliations:** <sup>1</sup>The Institute of Life Sciences, The Hebrew University of Jerusalem, Jerusalem, Israel. <sup>2</sup>Departamento de Microbiología y Genética, Campus Miguel de Unamuno, Universidad de Salamanca, Salamanca, Spain.

**Correspondence:** Aharon Oren, Hebrew University of Jerusalem, Dept of Plant and Environmental Sciences, The Institute of Life Sciences, Edmond J. Safra Campus, Jerusalem, 9190401, Israel. E-mail: aharon.oren@mail.huji.ac.il

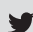

@ERSpublications

The message presented by Tortoli and co-workers in their paper “Same meat, different gravy: ignore the new names of mycobacteria” is correct, but the paper contains many errors and misconceptions about the functioning of the Prokaryotic Code and the IJSEM <http://bit.ly/2YD9u6s>

**Cite this article as:** Oren A, Trujillo ME. On the valid publication of names of mycobacteria. *Eur Respir J* 2019; 54: 1901483 [<https://doi.org/10.1183/13993003.01483-2019>].

This single-page version can be shared freely online.

## To the Editor:

In their paper entitled “Same meat, different gravy: ignore the new names of mycobacteria”, TORTOLI *et al.* [1] called to ignore the recently proposed generic names *Mycobacteroides*, *Mycolicibacter*, *Mycolicibacterium* and *Mycolicibacillus* in which some species of *Mycobacterium* were reclassified [2], and to keep using the old names. The authors correctly stated that with the validation of the new names in the *International Journal of Systematic and Evolutionary Microbiology (IJSEM)* [3], the old names remain validly published and anyone is free to use them. By explaining this, they did a great service to the community of microbiologists and clinicians. Arguments similar to those presented by TORTOLI *et al.* [1] against the use of the newly proposed names were brought forward following a proposal to rename the clinically important *Clostridium difficile* as *Clostridioides difficile* [4]. A paper was published to clarify that both names are validly published and can be used [5].
